# Supplementary material for: Polyaniline induced multi-functionalities in interfacially coupled electrocatalysts for hydrogen/oxygen evolution reactions
Source: Royal Society of Chemistry journal article supplement (doi:10.1039/d3ta02389c), 2023-01-01
Supplement: d3ta02389c1.pdf [file d3ta02389c1.pdf]

## Supporting Information

### **Polyaniline Induced Multi-functionalities in Interfacially Coupled Electrocatalysts for Hydrogen/Oxygen Evolution Reactions**

Niranjanmurthi Lingappan\*, Insu Jeon and Wonoh Lee\*

School of Mechanical Engineering, Chonnam National University, 77 Yongbong-ro, Buk-gu,  
Gwangju 61186, South Korea

**\* Corresponding authors**

**Prof. Wonoh Lee**

Email: wonohlee@jnu.ac.kr

**Dr. Niranjanmurthi Lingappan**

Email: niranjangowri@gmail.com

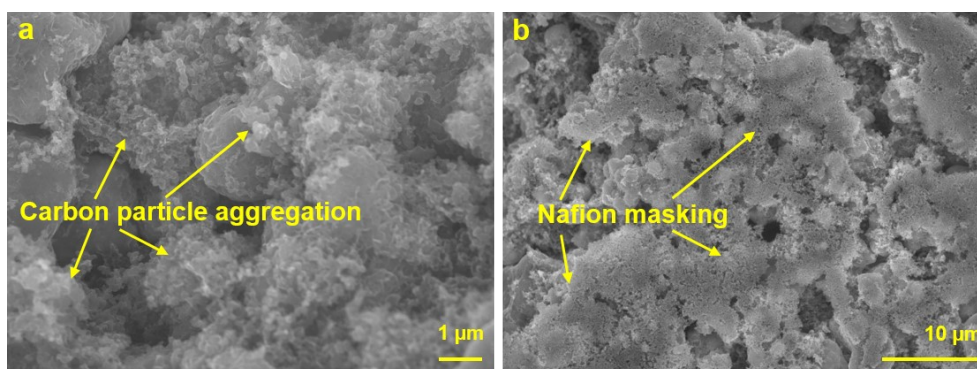

**Fig. S1.** FESEM images of (a) random distribution between MoS<sub>2</sub> and carbon particles, and (b) nafion masking of MoS<sub>2</sub>/carbon particles/nafion dispersion prepared through ultrasonication method.

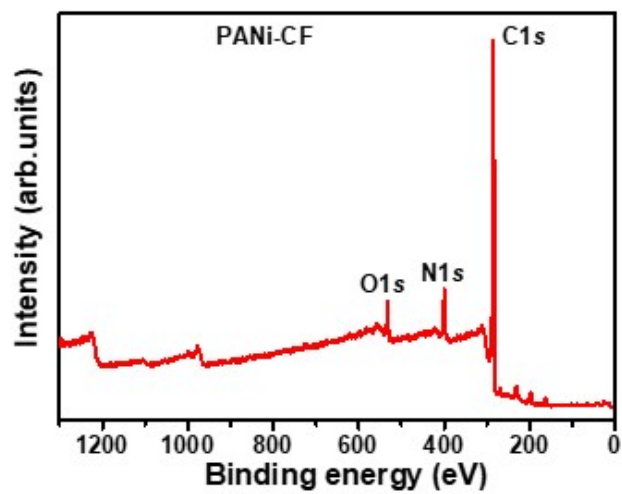

**Fig. S2.** XPS survey spectrum of PANi-CF.

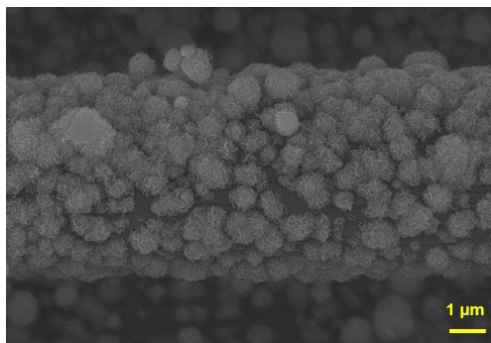

**Fig. S3.** FESEM image of MoS<sub>2</sub>@O-CF.

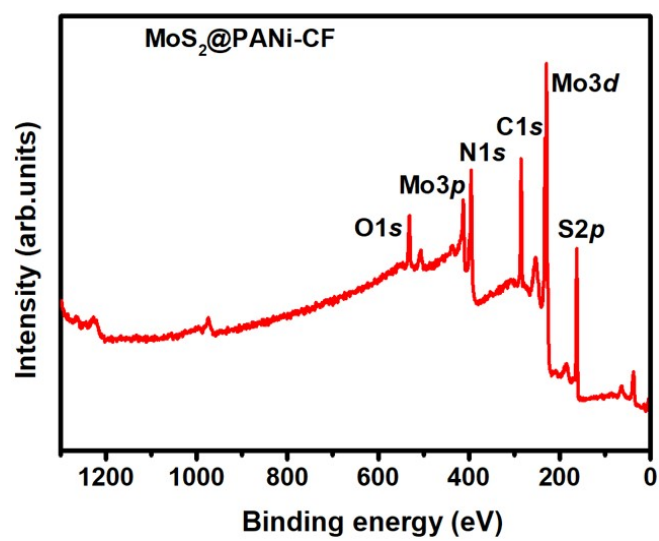

**Fig. S4.** XPS survey spectrum of MoS<sub>2</sub>@PANi-CF.

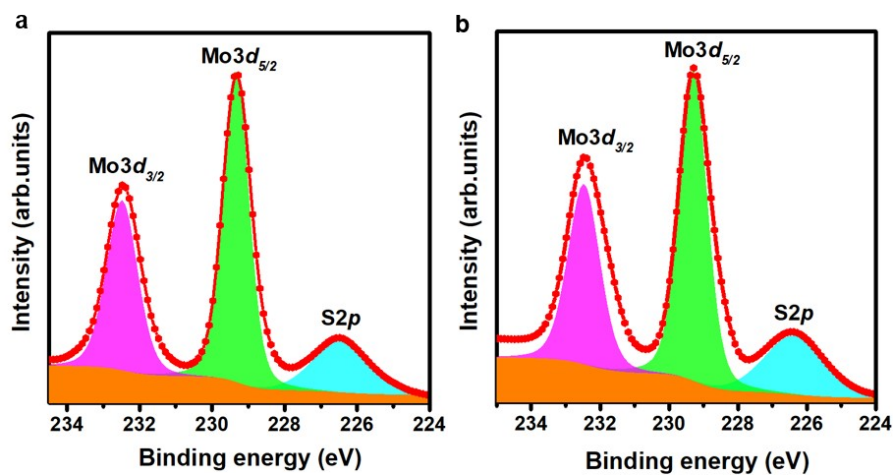

**Fig. S5.** Mo 3d XPS deconvoluted spectra of (a) MoS<sub>2</sub>@O-CF and (b) MoS<sub>2</sub>.

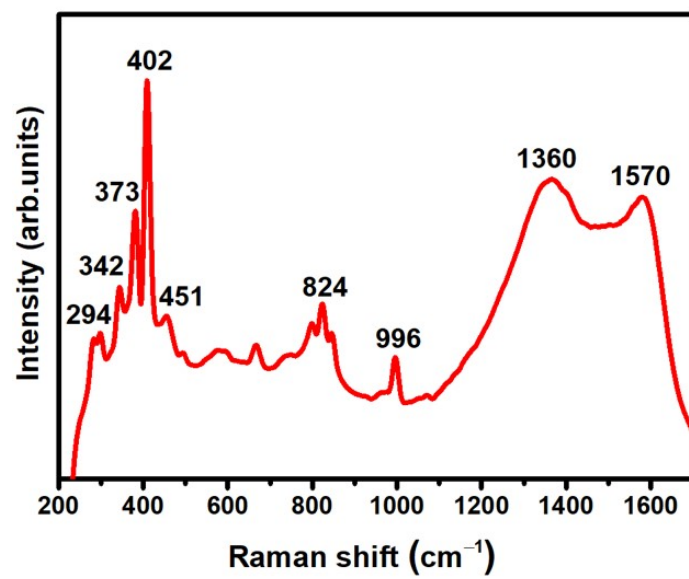

**Fig. S6.** Raman spectrum of MoS<sub>2</sub>@PANi-CF with a larger range.

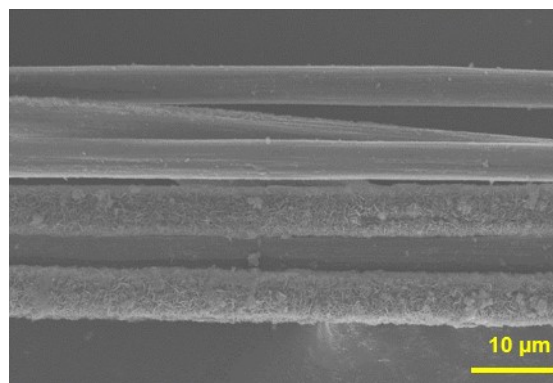

**Fig. S7.** FESEM image of NiFeLDH@O-CF.



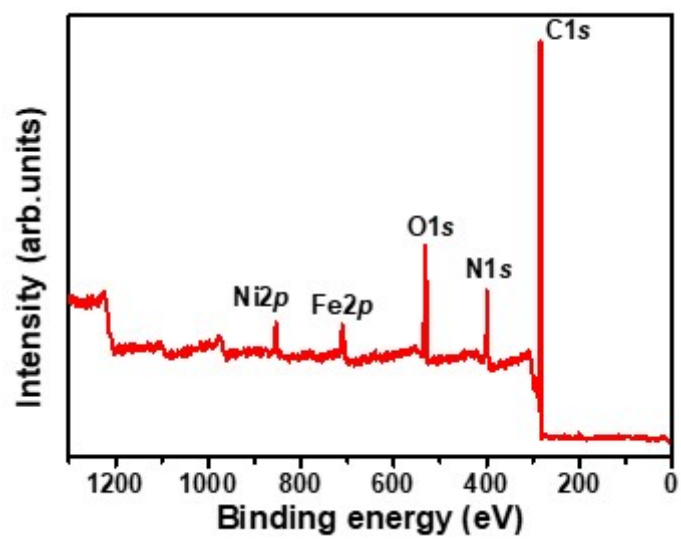

**Fig. S8.** XPS survey spectrum of NiFeLDH@PANi-CF.

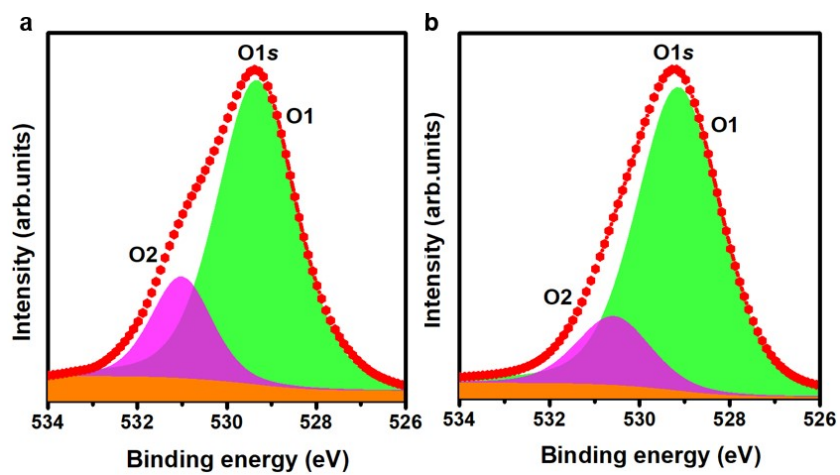

**Fig. S9.** O1s deconvolution XPS spectra of (a) NiFeLDH@O-CF and (b) NiFeLDH.

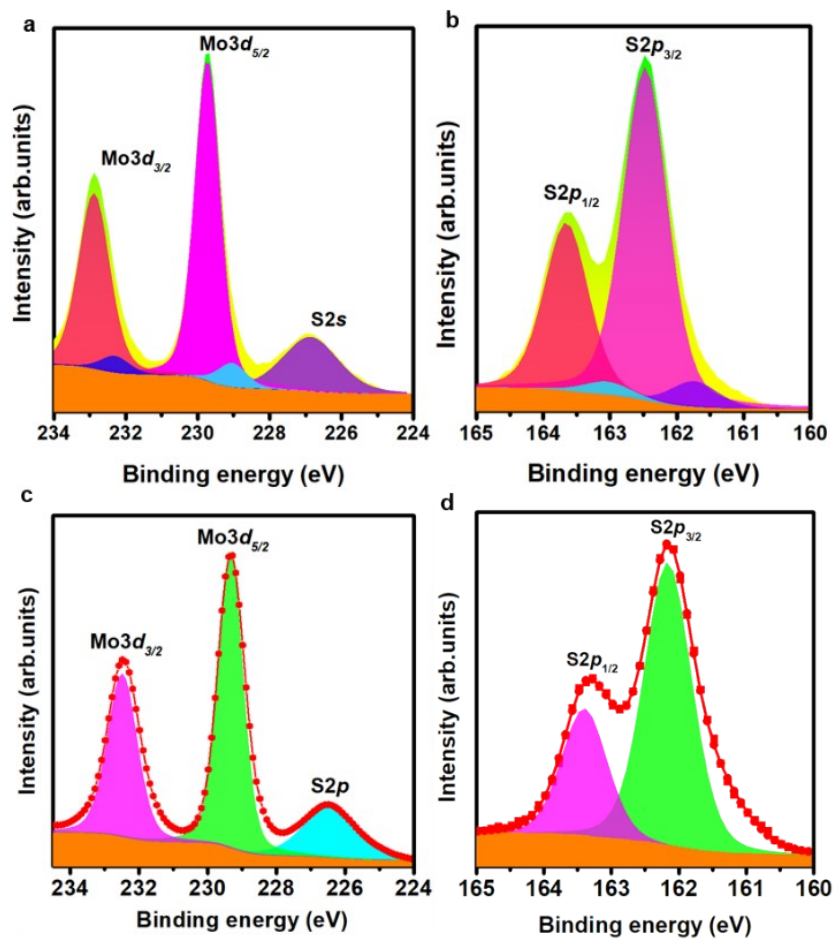

**Fig. S10.** Deconvoluted (a) Mo 3d and (b) S 2p XPS spectra of MoS<sub>2</sub>@PANi-CF and (c) Mo 3d and (d) S 2p XPS spectra of MoS<sub>2</sub>@O-CF prolonged cycling in acidic medium.

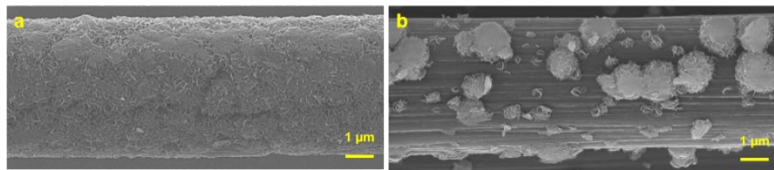

**Fig. S11.** FESEM image of (a) MoS<sub>2</sub>@PANI-CF and (b) MoS<sub>2</sub>@O-CF after durability test.

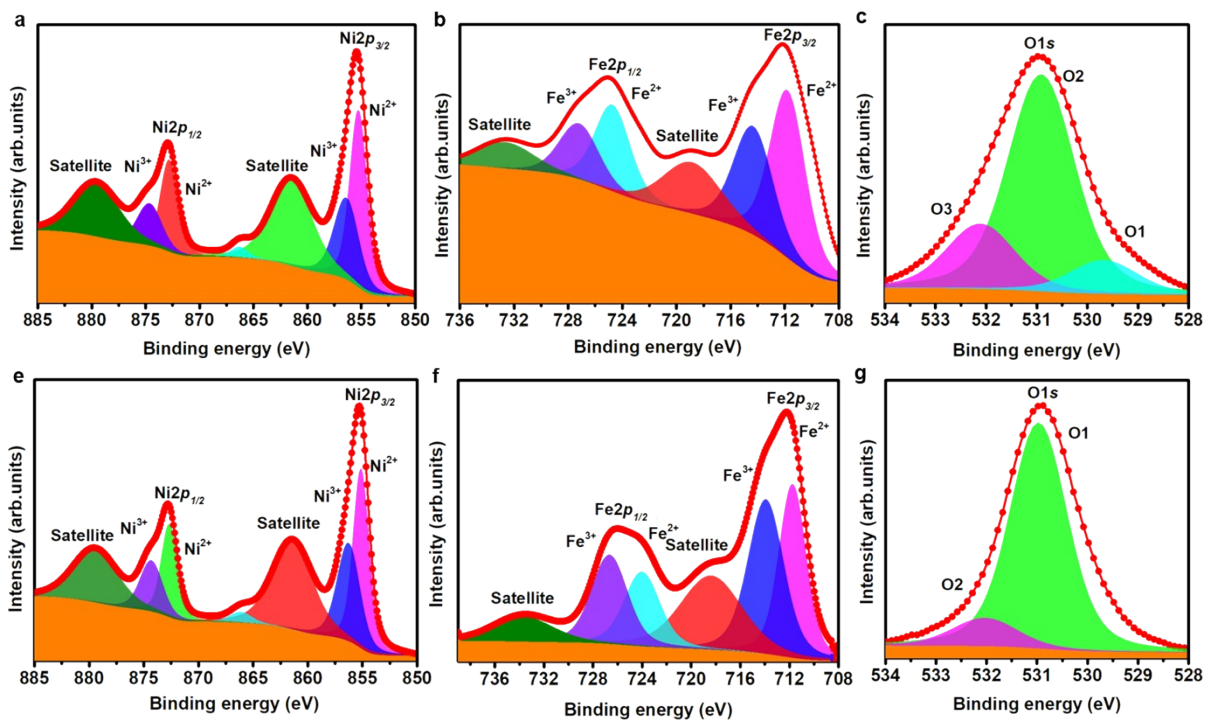

**Fig. S12.** Deconvoluted (a) Ni 2*p* and (b) Fe 2*p* and (c) O 1*s* XPS spectra of NiFeLDH@PANi-CF and (d) Ni 2*p* and (e) Fe 2*p* and (f) O 1*s* XPS spectra of NiFeLDH@O-CF after cycling in alkaline medium.

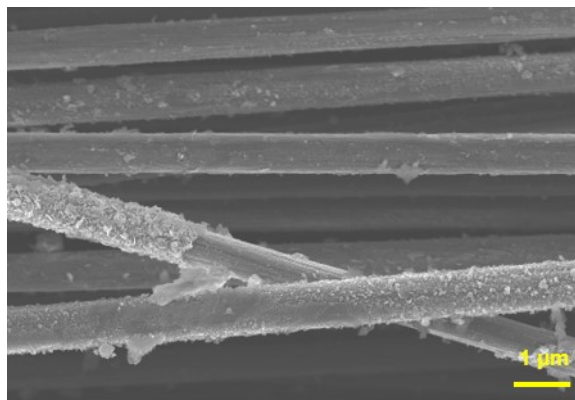

**Fig. S13.** FESEM image of NiFeLDH@O-CF after durability test.

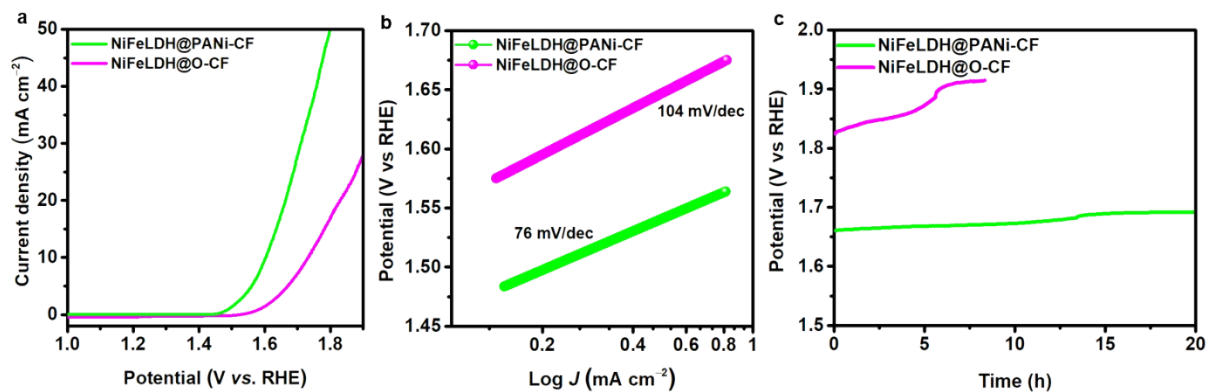

**Fig. S14.** The OER performance of NiFeLDH based catalysts in 0.5 M H<sub>2</sub>SO<sub>4</sub> electrolyte. (a) Polarization curves of NiFeLDH-based catalysts. (b) Tafel slopes of the NiFeLDH-based catalysts derived from the polarization curves of the catalysts. (c) Chronopotentiometric measurement of NiFeLDH catalysts at the current density of 20 mA cm<sup>-2</sup> in 0.5 M H<sub>2</sub>SO<sub>4</sub> electrolyte for 20 h.

**Table S1.** The HER performance of the MoS<sub>2</sub> based catalysts.

| Samples                                              | Onset potential [V vs. RHE] | Tafel slope [mV dec <sup>-1</sup> ] | Reference |                  |
|------------------------------------------------------|-----------------------------|-------------------------------------|-----------|------------------|
| 1T/2H MoS <sub>2</sub>                               | ~0.12                       | 110                                 | [S1]      |                  |
| 1T MoS <sub>2</sub>                                  | 0.2                         | 42                                  | [S2]      |                  |
| Ferromagnetic MoS <sub>2</sub>                       | 0.1                         | 59                                  | [S3]      |                  |
| Defect rich MoS <sub>2</sub>                         | 0.1                         | 95                                  | [S4]      |                  |
| Defect rich MoS <sub>2</sub>                         | ~0.15                       | 50                                  | [S5]      |                  |
| Three-dimensional MoS <sub>2</sub>                   | 0.2                         | 98                                  | [S6]      |                  |
| MoS <sub>2</sub> nanoflowers                         | 0.2                         | 52                                  | [S7]      |                  |
| MoS <sub>2</sub> nanosheets                          | ~0.25                       | 38                                  | [S8]      |                  |
| Monolayer MoS <sub>2</sub>                           | ~0.2                        | 53                                  | [S9]      |                  |
| Annealed MoS <sub>2</sub>                            | ~0.25                       | 71                                  | [S10]     |                  |
| MoS <sub>2</sub> Nanomesh                            | ~0.15                       | 46                                  | [S11]     |                  |
| MoS <sub>2</sub> Nanodots                            | 0.1                         | 61                                  | [S12]     |                  |
| Edge oriented MoS <sub>2</sub>                       | ~0.25                       | 50                                  | [S13]     |                  |
| Micro/Nano MoS <sub>2</sub>                          | ~0.17                       | 74                                  | [S14]     |                  |
| MoS <sub>2</sub> /graphene                           | ~0.12                       | 71                                  | [S15]     |                  |
| MoS <sub>2</sub> /carbon cloth                       | ~0.1                        | 42                                  | [S16]     |                  |
| MoS <sub>2</sub> /carbon foam                        | ~0.25                       | 44                                  | [S17]     |                  |
| MoS <sub>2</sub> /vertical graphene/<br>carbon cloth | ~0.15                       | 53                                  | [S18]     |                  |
| MoS <sub>2</sub> /Au/SiO <sub>2</sub> /Si            | ~0.15                       | 45                                  | [S19]     |                  |
| <b>Vacancy-induced<br/>MoS<sub>2</sub>@PANi-CF</b>   | <b>acidic</b>               | <b>0.03</b>                         | <b>35</b> | <b>This work</b> |
|                                                      | <b>alkaline</b>             | <b>0.04</b>                         | <b>40</b> |                  |
|                                                      | <b>neutral</b>              | <b>0.05</b>                         | <b>31</b> |                  |



**Table S2.** The OER performance of the NiFeLDH based catalysts.

| Samples                                       | Onset potential [V vs. RHE] | Tafel slope [mV dec <sup>-1</sup> ] | Reference |                  |
|-----------------------------------------------|-----------------------------|-------------------------------------|-----------|------------------|
| NiFeLDH/CNT                                   | 1.45                        | 31                                  | [S20]     |                  |
| Three-dimensional NiFeLDH                     | 1.46                        | 40                                  | [S21]     |                  |
| NiFeLDH/Graphene                              | 1.43                        | 39                                  | [S22]     |                  |
| NiFeLDH/Carbon quantum dot                    | 1.43                        | 35                                  | [S23]     |                  |
| NiFeLDH hollow spheres                        | 1.45                        | 53                                  | [S24]     |                  |
| NiFeLDH/Mesoporous graphene oxide nanospheres | 1.50                        | 63                                  | [S25]     |                  |
| NiFeLDH/Reduced graphene oxide                | 1.50                        | 91                                  | [S26]     |                  |
| Plasma assisted oxygen enriched NiFeLDH       | 1.48                        | 74                                  | [S27]     |                  |
| NiFeLDH edge active                           | 1.47                        | 35                                  | [S28]     |                  |
| NiFeLDH with oxygen vacancies                 | 1.45                        | 48                                  | [S29]     |                  |
| Edge-enriched NiFeLDH                         | 1.45                        | 41                                  | [S30]     |                  |
| NiFeLDH/carbon cloth                          | 1.50                        | 56                                  | [S31]     |                  |
| NiFeLDH/sulfonated carbon dots                | 1.42                        | 55                                  | [S32]     |                  |
| NiFeLDH edge rich                             | 1.52                        | 49                                  | [S33]     |                  |
| <b>Vacancy-induced NiFeLDH@PANi-CF</b>        | <b>alkaline</b>             | <b>1.44</b>                         | <b>47</b> | <b>This work</b> |
|                                               | <b>acidic</b>               | <b>1.48</b>                         | <b>76</b> |                  |

## References for Supporting Information

- [S1] Z. Liu, Z. Gao, Y. Liu, M. Xia, R. Wang, N. Li. *ACS Appl. Materials & Interfaces*, 9 (2017) 25291-25297.
- [S2] S. Wang, D. Zhang, B. Li, C. Zhang, Z. Du, H. Yin, X. Bi, S. Yang. *Adv. Energy Mater.* 8 (2018) 1801345.
- [S3] W. Zhou, M. Chen, M. Guo, A. Hong, T. Yu, X. Luo, C. Yuan, W. Lei, S. Wang. *Nano Lett.* 20 (2020) 2923-2930.
- [S4] J. Xie, H. Qu, J. Xin, X. Zhang, G. Cui, X. Zhang, J. Bao, B. Tang, Y. Xie. *Nano Res.* 10 (2017) 1178-1188.
- [S5] J. Xie, H. Zhang, S. Li, R. Wang, X. Sun, M. Zhou, J. Zhou, X.W. Lou, Y. Xie. *Adv. Mater.* 25 (2013) 5807-5813.
- [S6] X. Geng, W. Wu, N. Li, W. Sun, J. Armstrong, A. Al-hilo, M. Brozak, J. Cui, T.-p. Chen. *Adv. Funct. Mater.* 24 (2014) 6123-6129.
- [S7] D. Wang, Z. Pan, Z. Wu, Z. Wang, Z. Liu. *J. Power Sources*, 264 (2014) 229-234.
- [S8] J. Wang, M. Yan, K. Zhao, X. Liao, P. Wang, X. Pan, W. Yang, L. Mai. *Adv. Mater.* 29 (2017) 1604464.
- [S9] J. Zhang, J. Wu, H. Guo, W. Chen, J. Yuan, U. Martinez, G. Gupta, A. Mohite, P.M. Ajayan, J. Lou. *Adv. Mater.* 29 (2017) 1701955.
- [S10] D. Kiriya, P. Lobaccaro, H.Y.Y. Nyein, P. Taheri, M. Hettick, H. Shiraki, C.M. Sutter-Fella, P. Zhao, W. Gao, R. Maboudian, J.W. Ager, A. Javey. *Nano Lett.* 16 (2016) 4047-4053.
- [S11] Y. Li, K. Yin, L. Wang, X. Lu, Y. Zhang, Y. Liu, D. Yan, Y. Song, S. Luo. *Appl. Catal. B.* 239 (2018) 537-544.
- [S12] J. Benson, M. Li, S. Wang, P. Wang, P. Papakonstantinou. *ACS Appl. Mater. Interfaces*, 7 (2015) 14113-14122.
- [S13] Y. Yang, H. Fei, G. Ruan, C. Xiang, J.M. Tour. *Adv. Mater.* 26 (2014) 8163-8168.
- [S14] B. Guo, K. Yu, H. Li, H. Song, Y. Zhang, X. Lei, H. Fu, Y. Tan, Z. Zhu. *ACS Appl. Mater. Interfaces*, 8 (2016) 5517-5525.
- [S15] X. Meng, L. Yu, C. Ma, B. Nan, R. Si, Y. Tu, J. Deng, D. Deng, X. Bao. *Nano Energy*, 61 (2019) 611-616.
- [S16] X. Zang, C. Zhou, Q. Shao, S. Yu, Y. Qin, X. Lin, N. Cao. *Energy Technol.* 7 (2019) 1900052.

- [S17] X. Guo, G.L. Cao, F. Ding, X. Li, S. Zhen, Y.F. Xue, Y.-m. Yan, T. Liu, K.N. Sun. . Mater. Chem. A, 3 (2015) 5041-5046.
- [S18] Z. Zhang, W. Li, M.F. Yuen, T.W. Ng, Y. Tang, C.S. Lee, X. Chen, W. Zhang. Nano Energy. 18 (2015) 196-204.
- [S19] D. Voiry, R. Fullon, J. Yang, C. de Carvalho Castro e Silva, R. Kappera, I. Bozkurt, D. Kaplan, M.J. Lagos, P.E. Batson, G. Gupta, Aditya D. Mohite, L. Dong, D. Er, V.B. Shenoy, T. Asefa, M. Chhowalla. Nat. Mater. 15 (2016) 1003-1009.
- [S20] M. Gong, Y. Li, H. Wang, Y. Liang, J.Z. Wu, J. Zhou, J. Wang, T. Regier, F. Wei, H. Dai. J. Am. Chem. Soc. 135 (2013) 8452-8455.
- [S21] Z. Lu, W. Xu, W. Zhu, Q. Yang, X. Lei, J. Liu, Y. Li, X. Sun, X. Duan. Chem. Commun. 50 (2014) 6479-6482.
- [S22] X. Long, J. Li, S. Xiao, K. Yan, Z. Wang, H. Chen, S. Yang. Angew. Chem. Int. Ed. 53 (2014) 7584-7588.
- [S23] D. Tang, J. Liu, X. Wu, R. Liu, X. Han, Y. Han, H. Huang, Y. Liu, Z. Kang. ACS Appl. Mater. Interfaces, 6 (2014) 7918-7925.
- [S24] C. Zhang, M. Shao, L. Zhou, Z. Li, K. Xiao, M. Wei. ACS Appl. Mater. Interfaces, 8 (2016) 33697-33703.
- [S25] T. Zhan, X. Liu, S. Lu, W. Hou. Appl. Catal. B. 205 (2017) 551-558.
- [S26] T. Zhan, Y. Zhang, X. Liu, S. Lu, W. Hou. J. Power Sources, 333 (2016) 53-60.
- [S27] H. Chen, Q. Zhao, L. Gao, J. Ran, Y. Hou. ACS Sustain. Chem. Eng. 7 (2019) 4247-4254.
- [S28] J.W. Zhao, Z.-X. Shi, C.F. Li, L.F. Gu, G.R. Li. Chem. Sci. 12 (2021) 650-659.
- [S29] S. Liu, H. Zhang, E. Hu, T. Zhu, C. Zhou, Y. Huang, M. Ling, X. Gao, Z. Lin. J. Mater. Chem. A, 9 (2021) 23697-23702.
- [S30] B. Wang, X. Han, C. Guo, J. Jing, C. Yang, Y. Li, A. Han, D. Wang, J. Liu. Appl. Catal. B. 298 (2021) 120580.
- [S31] G. Huang, C. Zhang, Z. Liu, S. Yuan, G. Yang, N. Li. Appl. Surf. Sci. 565 (2021) 150533.
- [S32] W. Zhu, S. Chen, F. Liao, X. Zhao, H. Shi, Y. Shi, L. Xu, Q. Shao, Z. Kang, M. Shao. Chem. Eng. J. 420 (2021) 129690.
- [S33] Y. Zhang, W. Xie, J. Ma, L. Chen, C. Chen, X. Zhang, M. Shao. J. Energy Chem. 60 (2021) 127-134.
